# Supplementary material for: Identification of an l-Arabitol Transporter from Aspergillus niger
Source: MDPI journal article supplement (doi:10.3390/biom13020188), 2023-01-17

**Table S1.** Primers used in this study. The guide RNAs (gRNA) for gene deletion are marked in red and the linkers are shown in blue.

| Primers                | Sequences                                            | Description                                                                           |
|------------------------|------------------------------------------------------|---------------------------------------------------------------------------------------|
| P1                     | CAACCTCCAATCCAATTTGACTCCGCCGAACGT<br>ACTG            | For constructing gRNA                                                                 |
| P2                     | ACTACTCTACCACTATTTGAAAAGCAAAAAAG<br>GAAGGTACAAAAAAGC | For constructing gRNA                                                                 |
| P3- <i>latA</i>        | ATGGGCTGTCCGACGCGAAAGACGAGCTTACT<br>CGTTTCG          | For constructing gRNA of <i>latA</i>                                                  |
| P4- <i>latA</i>        | TTTCGCGTCGGACAGCCCATGTTTATAGAGCTA<br>GAAATAGCAAG     | For constructing gRNA of <i>latA</i>                                                  |
| <i>latA</i> 5' Fw      | CCTAATCCGCTATCCCAAC                                  | For amplifying <i>latA</i> 5' flank and identifying<br>correct deletion mutation      |
| <i>latA</i> 5' Rv      | CGATAGCGAATCCTAGCAGTGGTGACTACGCT<br>AGGGTAG          | For amplifying <i>latA</i> 5' flank                                                   |
| <i>latA</i> 3' Fw      | ACTGCTAGGATTCGCTATCGGCACCTTTCTAAT<br>GACTG           | For amplifying <i>latA</i> 3' flank                                                   |
| <i>latA</i> 3' Rv      | CAGATCACCGTACCAGCG                                   | For amplifying <i>latA</i> 3' flank and identifying<br>correct deletion mutation      |
| <i>latA</i> 5' NEST Fw | CTGTACCACCGCTCCAG                                    | For fusion of <i>latA</i> 5' and 3' flanks                                            |
| <i>latA</i> 3' NEST Rv | CTAATTCACAGTCTACATTC                                 | For fusion of <i>latA</i> 5' and 3' flanks                                            |
| P3-NRRL3_05659         | CCGTGCAACTCTTGCTTCTGACGAGCTTACTC<br>GTTTCG           | For constructing gRNA of gene<br>NRRL3_05659                                          |
| P4-NRRL3_05659         | AGGAAGCAAGAGTTGCACGGGTTTATAGAGCT<br>AGAAATAGCAAG     | For constructing gRNA of gene<br>NRRL3_05659                                          |
| NRRL3_05659 5' Fw      | CTTTCACCTTCAGTCTATCTGG                               | For amplifying gene NRRL3_05659 5' flank<br>and identifying correct deletion mutation |
| NRRL3_05659 5' Rv      | CGATAGCGAATCCTAGCAGTCCAGGCTTAGGA<br>CGACAG           | For amplifying gene NRRL3_05659 5' flank                                              |
| NRRL3_05659 3' Fw      | ACTGCTAGGATTCGCTATCGGTCTATGAGCAC<br>TTCAAG           | For amplifying gene NRRL3_05659 3' flank                                              |
| NRRL3_05659 3' Rv      | GGGATTGTAAGAGTGTGC                                   | For amplifying gene NRRL3_05659 3' flank<br>and identifying correct deletion mutation |
| NRRL3_05659 5' NEST Fw | GGCAAATGCTTACCATCG                                   | For fusion of gene NRRL3_05659 5' and 3'<br>flanks                                    |
| NRRL3_05659 3' NEST Rv | GGGTCTTTTGTAGATAC                                    | For fusion of gene NRRL3_05659 5' and 3'<br>flanks                                    |

**Table S2.** Composition of wheat bran and sugar beet pulp (mol%).

|                 | Rha | Ara         | Xyl         | Man | Gal | Glc  | GalUA | Total | polysaccharides               |
|-----------------|-----|-------------|-------------|-----|-----|------|-------|-------|-------------------------------|
| Wheat bran      | 0.0 | <b>16.5</b> | <b>34.6</b> | 1.4 | 1.7 | 42.5 | 3.3   | 53.7  | cellulose, arabinoxylan       |
| Sugar beet pulp | 1.5 | <b>29.0</b> | 2.4         | 2.1 | 6.5 | 32.0 | 27.0  | 56.0  | cellulose, pectin, xyloglucan |

**Figure S1.** The polyol consumption of the *A. niger* reference strain N593  $\Delta ku70$  and the mutant  $\Delta latA$  in the liquid culture containing a mixture of L-arabitol and xylitol as the substrate. The error bars indicate the standard deviation between biological triplicates.

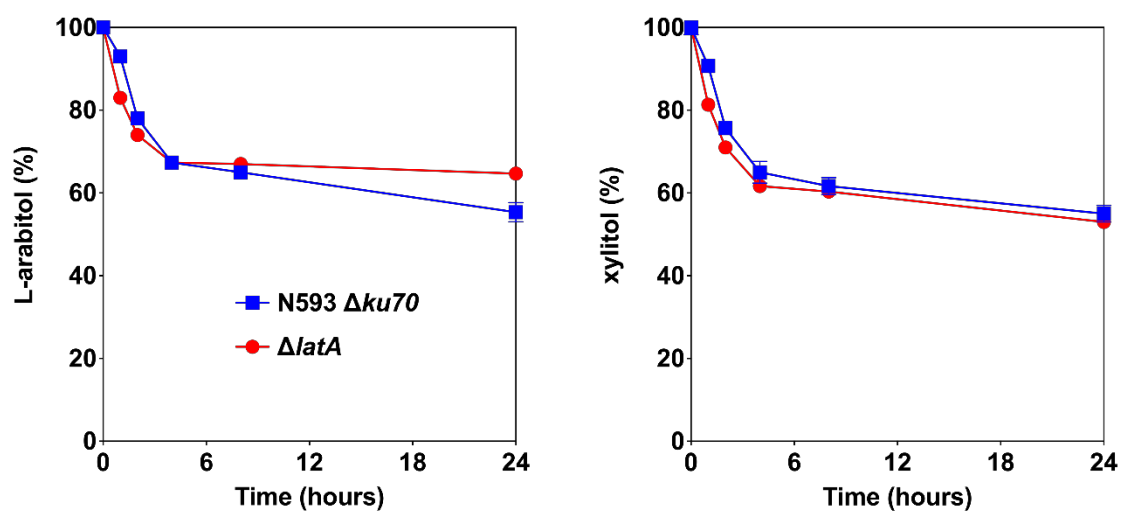

Supplement: s1 [file s1]
